# Supplementary material for: Interrogating the bovine reproductive tract metagenomes using culture-independent approaches: a systematic review
Source: PubMed Central journal article supplement (PMC8191003; doi:10.1186/s42523-021-00106-3), 2021-06-09
Supplement: 42523_2021_106_MOESM2_ESM.pdf [file 42523_2021_106_MOESM2_ESM.pdf]

## Additional File 2: Data extraction and stratification from 46 papers included in systematic review.

| Paper ID | Year of Publication | Analysis Platform            | Sequencing Region            | WHO Regions                  | Cattle Breed                 | Sample Sizes                 | Reproductive tract           | Specimen type | Microbiome DNA Isolation     | Species Identification       | Rationale                  |
|----------|---------------------|------------------------------|------------------------------|------------------------------|------------------------------|------------------------------|------------------------------|---------------|------------------------------|------------------------------|----------------------------|
| 1        | 2011                | Multiple/Other/Not specified | Multiple/Other/Not specified | Region of the Americas       | Holstein                     | 11-50                        | Uterus                       | Wash          | Column-based                 | Multiple/Other/Not specified | Pathology                  |
| 2        | 2012                | Pyrosequencing               | 16S V1-V2                    | Region of the Americas       | Holstein                     | 51-100                       | Uterus                       | Wash          | Column-based                 | RDP/RDP II                   | Intervention               |
| 3        | 2013                | Multiple/Other/Not specified | Multiple/Other/Not specified | Region of the Americas       | Holstein                     | 11-50                        | Vagina                       | Swab          | Magnetic-based               | RDP/RDP II                   | Pathology                  |
| 4        | 2014                | Multiple/Other/Not specified | Multiple/Other/Not specified | European Region              | Holstein                     | 11-50                        | Uterus                       | Swab          | Multiple/Other/Not specified | EzTaxon server               | Pathology                  |
| 5        | 2014                | Illumina                     | 16S V3-V4                    | Region of the Americas       | Crossbreed                   | 11-50                        | Vagina                       | Wash          | Column-based                 | RDP/RDP II                   | Baseline                   |
| 6        | 2015                | Illumina                     | Multiple/Other/Not specified | Region of the Americas       | Nellore                      | 11-50                        | Vagina                       | Wash          | Column-based                 | M5RNA                        | Fertility/Pregnancy stages |
| 7        | 2015                | Multiple/Other/Not specified | Multiple/Other/Not specified | European Region              | Multiple/Other/Not specified | 101-200                      | Uterus                       | Swab          | Multiple/Other/Not specified | EzTaxon server               | Pathology                  |
| 8        | 2015                | Illumina                     | 16S V1-V2                    | European Region              | Multiple/Other/Not specified | 11-50                        | Uterus                       | Multiple      | Magnetic-based               | RDP/RDP II                   | Pathology                  |
| 9        | 2015                | Illumina                     | 16S V4                       | Region of the Americas       | Holstein                     | 51-100                       | Uterus                       | Swab          | Column-based                 | Greengenes                   | Pathology                  |
| 10       | 2015                | Pyrosequencing               | 16S V5-V6                    | Multiple/Other/Not specified | Multiple/Other/Not specified | <=10                         | Vagina                       | Swab          | Column-based                 | RDP/RDP II                   | Pathology                  |
| 11       | 2016                | Multiple/Other/Not specified | Multiple/Other/Not specified | Multiple/Other/Not specified | Crossbreed                   | 11-50                        | Vagina                       | Swab          | Column-based                 | RDP/RDP II                   | Pathology                  |
| 12       | 2016                | Illumina                     | 16S V1-V2                    | European Region              | Holstein                     | 51-100                       | Uterus                       | Multiple      | Magnetic-based               | RDP/RDP II                   | Pathology                  |
| 13       | 2016                | Multiple/Other/Not specified | Multiple/Other/Not specified | Western Pacific Region       | Multiple/Other/Not specified | <=10                         | Vagina                       | Swab          | Column-based                 | Genbank                      | Pathology                  |
| 14       | 2016                | Illumina                     | 16S V4                       | Region of the Americas       | Holstein                     | >=200                        | Uterus                       | Swab          | Column-based                 | Greengenes                   | Pathology                  |
| 15       | 2017                | Illumina                     | Shotgun                      | Region of the Americas       | Holstein                     | 11-50                        | Uterus                       | Swab          | Column-based                 | M5RNA                        | Pathology                  |
| 16       | 2017                | Illumina                     | Shotgun                      | Region of the Americas       | Holstein                     | 11-50                        | Uterus                       | Swab          | Column-based                 | Multiple/Other/Not specified | Pathology                  |
| 17       | 2017                | Illumina                     | 16S V1-V3                    | Region of the Americas       | Angus                        | 11-50                        | Multiple/Other/Not specified | Multiple      | Column-based                 | Greengenes                   | Fertility/Pregnancy stages |
| 18       | 2017                | Pyrosequencing               | 16S V1-V3                    | European Region              | Multiple/Other/Not specified | 11-50                        | Vagina                       | Biopsy        | Column-based                 | RDP/RDP II                   | Pathology                  |
| 19       | 2017                | Illumina                     | 16S V4                       | Region of the Americas       | Multiple/Other/Not specified | Multiple/Other/Not specified | Multiple/Other/Not specified | Multiple      | Precipitation-based          | Greengenes                   | Fertility/Pregnancy stages |
| 20       | 2017                | Illumina                     | 16S V4                       | Region of the Americas       | Holstein                     | 101-200                      | Vagina                       | Swab          | Column-based                 | Greengenes                   | Pathology                  |
| 21       | 2017                | Illumina                     | 16S V4                       | Region of the Americas       | Holstein                     | 11-50                        | Multiple/Other/Not specified | Multiple      | Column-based                 | Greengenes                   | Transmission               |
| 22       | 2017                | Illumina                     | 16S V4                       | Western Pacific Region       | Multiple/Other/Not specified | 11-50                        | Vagina                       | Swab          | Column-based                 | RDP/RDP II                   | Breed                      |
| 23       | 2018                | Pyrosequencing               | 16S V1-V3                    | Multiple/Other/Not specified | Holstein                     | 11-50                        | Uterus                       | Multiple      | Column-based                 | SILVA                        | Pathology                  |
| 24       | 2018                | Illumina                     | 16S V3-V4                    | Region of the Americas       | Holstein                     | 11-50                        | Multiple/Other/Not specified | Multiple      | Column-based                 | SILVA                        | Transmission               |
| 25       | 2018                | Illumina                     | 16S V3-V4                    | Western Pacific Region       | Holstein                     | 11-50                        | Uterus                       | Wash          | Column-based                 | Multiple/Other/Not specified | Pathology                  |
| 26       | 2018                | Illumina                     | 16S V4                       | Region of the Americas       | Holstein                     | 11-50                        | Uterus                       | Swab          | Column-based                 | Greengenes                   | Intervention               |

|    |      |                              |                              |                              |                              |         |                              |          |                     |                              |                            |
|----|------|------------------------------|------------------------------|------------------------------|------------------------------|---------|------------------------------|----------|---------------------|------------------------------|----------------------------|
| 27 | 2018 | Illumina                     | 16S V4-V6                    | Western Pacific Region       | Multiple/Other/Not specified | 11-50   | Multiple/Other/Not specified | Swab     | Column-based        | RDP/RDP II                   | Pathology                  |
| 28 | 2019 | Illumina                     | Multiple/Other/Not specified | Multiple/Other/Not specified | Gyr                          | <=10    | Vagina                       | Wash     | Column-based        | M5RNA                        | Breed                      |
| 29 | 2019 | Multiple/Other/Not specified | Multiple/Other/Not specified | European Region              | Multiple/Other/Not specified | 51-100  | Multiple/Other/Not specified | Swab     | Column-based        | Greengenes                   | Pathology                  |
| 30 | 2019 | Illumina                     | 16S V1-V3                    | Region of the Americas       | Multiple/Other/Not specified | 11-50   | Multiple/Other/Not specified | Wash     | Column-based        | Greengenes                   | Fertility/Pregnancy stages |
| 31 | 2019 | Illumina                     | 16S V3-V4                    | Multiple/Other/Not specified | Holstein                     | 11-50   | Multiple/Other/Not specified | Multiple | Column-based        | Multiple/Other/Not specified | Transmission               |
| 32 | 2019 | Illumina                     | 16S V4                       | Region of the Americas       | Holstein                     | 101-200 | Vagina                       | Swab     | Column-based        | Greengenes                   | Intervention               |
| 33 | 2019 | Illumina                     | 16S V4                       | Western Pacific Region       | Multiple/Other/Not specified | 11-50   | Uterus                       | Multiple | Column-based        | RDP/RDP II                   | Transmission               |
| 34 | 2019 | Illumina                     | 16S V4                       | Region of the Americas       | Multiple/Other/Not specified | 11-50   | Uterus                       | Biopsy   | Precipitation-based | SILVA                        | Cyclicality stages         |
| 35 | 2019 | Illumina                     | 16S V4                       | Region of the Americas       | Holstein                     | 51-100  | Multiple/Other/Not specified | Multiple | Column-based        | Greengenes                   | Transmission               |
| 36 | 2019 | Illumina                     | 16S V4                       | Region of the Americas       | Crossbreed                   | 51-100  | Multiple/Other/Not specified | Multiple | Column-based        | Multiple/Other/Not specified | Fertility/Pregnancy stages |
| 37 | 2019 | Illumina                     | Shotgun                      | Western Pacific Region       | Multiple/Other/Not specified | <=10    | Multiple/Other/Not specified | Swab     | Column-based        | Multiple/Other/Not specified | Baseline                   |
| 38 | 2020 | Illumina                     | 16S V3-V4                    | Western Pacific Region       | Holstein                     | 51-100  | Vagina                       | Swab     | Column-based        | Greengenes                   | Fertility/Pregnancy stages |
| 39 | 2020 | Illumina                     | 16S V3-V4                    | European Region              | Holstein                     | 11-50   | Multiple/Other/Not specified | Multiple | Column-based        | SILVA                        | Cyclicality stages         |
| 40 | 2020 | Illumina                     | 16S V3-V4                    | Multiple/Other/Not specified | Holstein                     | 11-50   | Vagina                       | Swab     | Column-based        | SILVA                        | Intervention               |
| 41 | 2020 | Illumina                     | 16S V4                       | Region of the Americas       | Multiple/Other/Not specified | 51-100  | Multiple/Other/Not specified | Swab     | Magnetic-based      | SILVA                        | Baseline                   |
| 42 | 2020 | Illumina                     | 16S V4                       | Region of the Americas       | Brangus                      | 51-100  | Vagina                       | Swab     | Magnetic-based      | Greengenes                   | Intervention               |
| 43 | 2020 | Illumina                     | 16S V4                       | Multiple/Other/Not specified | Holstein                     | >=200   | Vagina                       | Swab     | Column-based        | Greengenes                   | Intervention               |
| 44 | 2020 | Illumina                     | 16S V4                       | Region of the Americas       | Holstein                     | 51-100  | Uterus                       | Swab     | Column-based        | Greengenes                   | Intervention               |
| 45 | 2020 | Illumina                     | 16S V4                       | Region of the Americas       | Holstein                     | 11-50   | Uterus                       | Swab     | Column-based        | Multiple/Other/Not specified | Pathology                  |
| 46 | 2020 | Illumina                     | 16S V4-V5                    | Western Pacific Region       | Multiple/Other/Not specified | <=10    | Uterus                       | Wash     | Column-based        | RDP/RDP II                   | Pathology                  |
