# Supplementary material for: Interrogating the bovine reproductive tract metagenomes using culture-independent approaches: a systematic review
Source: Anim Microbiome. 2021 Jun 9;3:41. doi: 10.1186/s42523-021-00106-3 (PMC8191003; doi:10.1186/s42523-021-00106-3)
Supplement: Supplementary file 3 — Additional file 3. Biodiversity indexes from 46 papers included in systematic review. [file 42523_2021_106_MOESM3_ESM.pdf]

Additional File 3: Biodiversity indexes from 46 papers included in systematic review.

[illegible]

[illegible]

[illegible]
